# Supplementary material for: Caffeic acid attenuates the angiogenic function of hepatocellular carcinoma cells via reduction in JNK-1-mediated HIF-1α stabilization in hypoxia
Source: Royal Society of Chemistry journal article supplement (doi:10.1039/c6ra07703j), 2016-01-01
Supplement: c6ra07703j1.pdf [file c6ra07703j1.pdf]

## SUPPLEMENTARY DATA

Table S1. Primers used in this study

| genes                 | primers (5'-3')             |
|-----------------------|-----------------------------|
| VEGF-A                | CGAACGTACTTGCAGATGTG (F)    |
|                       | CTGTTCTGTCGATGGTGATG (R)    |
| HIF-1 $\alpha$        | TTTGGCAGCAACGACA (F)        |
|                       | AGCGGTGGGTAATGGA (R)        |
| Tubulin               | CCCGTCTTCAGGGTCTCTTG (F)    |
|                       | TTAAGGTAAGTGTAGGTTG (R)     |
| HIF-1 $\alpha$ (ChIP) | CAGGAACAAGGGCCTCTGTCT (F)   |
|                       | TGTCCCTCTGACAATGTGCCATC (R) |

Figure S1

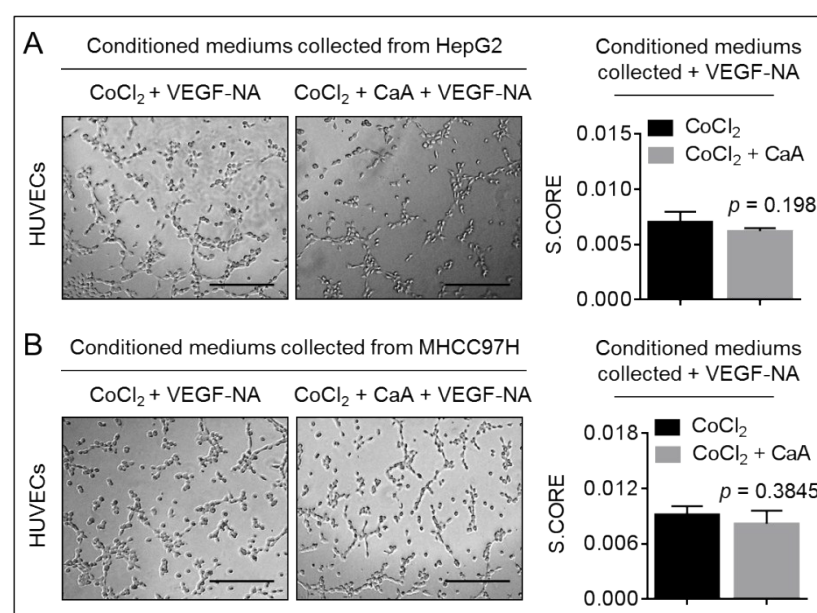

Figure S1. HUVECs were exposed to the conditioned mediums, as indicated, for 6 h, respectively, and the formations of tube were detected. Bars = 250  $\mu$ m. Quantification of tube formation was assisted by S.CORE. A two-tailed student's t test was used for statistical analysis.

Figure S2

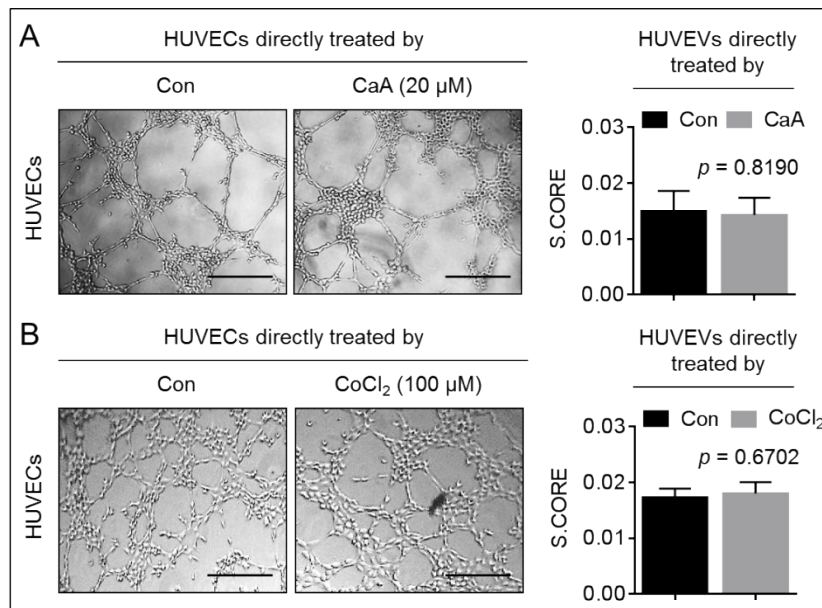

Figure S2. HUVECs were directly exposed to CaA or CoCl<sub>2</sub> for 6 h, respectively, and the tube formations were evaluated. Bars = 250 μm. Quantification of tube formation was assisted by S.CORE. A two-tailed student's t test was used for statistical analysis.
